# Supplementary material
Source: ML conference proceedings conference paper supplement (https://proceedings.neurips.cc/paper_files/paper/2022/hash/7e9fbd01b3084956dd8a070c7bf30bad-Abstract.html)
Supplement: Supplementary file 1 [file 7e9fbd01b3084956dd8a070c7bf30bad-Supplemental-Conference.zip]

Archive with 42 entries (37 files):
- 5444_causality_driven_hierarchical_-Supplementary Material/
- 5444_causality_driven_hierarchical_-Supplementary Material/CDHRL/
- 5444_causality_driven_hierarchical_-Supplementary Material/CDHRL/cdhrl_train.py
- 5444_causality_driven_hierarchical_-Supplementary Material/CDHRL/DQN.py
- 5444_causality_driven_hierarchical_-Supplementary Material/CDHRL/HRL.py
- 5444_causality_driven_hierarchical_-Supplementary Material/CDHRL/mc.py
- 5444_causality_driven_hierarchical_-Supplementary Material/CDHRL/minecraft/
- 5444_causality_driven_hierarchical_-Supplementary Material/CDHRL/minecraft/.mining.py.swp
- 5444_causality_driven_hierarchical_-Supplementary Material/CDHRL/minecraft/mazeenv.py
- 5444_causality_driven_hierarchical_-Supplementary Material/CDHRL/minecraft/mazemap.py
- 5444_causality_driven_hierarchical_-Supplementary Material/CDHRL/minecraft/mining.py
- 5444_causality_driven_hierarchical_-Supplementary Material/CDHRL/minecraft/utils.py
- 5444_causality_driven_hierarchical_-Supplementary Material/CDHRL/minecraft/__pycache__/
- 5444_causality_driven_hierarchical_-Supplementary Material/CDHRL/minecraft/__pycache__/mazeenv.cpython-36.pyc
- 5444_causality_driven_hierarchical_-Supplementary Material/CDHRL/minecraft/__pycache__/mazemap.cpython-36.pyc
- 5444_causality_driven_hierarchical_-Supplementary Material/CDHRL/minecraft/__pycache__/mining.cpython-36.pyc
- 5444_causality_driven_hierarchical_-Supplementary Material/CDHRL/minecraft/__pycache__/utils.cpython-36.pyc
- 5444_causality_driven_hierarchical_-Supplementary Material/CDHRL/models.py
- 5444_causality_driven_hierarchical_-Supplementary Material/CDHRL/pretrained_models/
- 5444_causality_driven_hierarchical_-Supplementary Material/CDHRL/pretrained_models/hrl_HRL_minecraftpretrain6.info
- 5444_causality_driven_hierarchical_-Supplementary Material/CDHRL/pretrained_models/HRL_minecraftpretrain6_level_0_eval.pth
- 5444_causality_driven_hierarchical_-Supplementary Material/CDHRL/pretrained_models/HRL_minecraftpretrain6_level_0_state.pth
- 5444_causality_driven_hierarchical_-Supplementary Material/CDHRL/pretrained_models/HRL_minecraftpretrain6_level_0_target.pth
- 5444_causality_driven_hierarchical_-Supplementary Material/CDHRL/pretrained_models/HRL_minecraftpretrain6_level_1_eval.pth
- 5444_causality_driven_hierarchical_-Supplementary Material/CDHRL/pretrained_models/HRL_minecraftpretrain6_level_1_state.pth
- 5444_causality_driven_hierarchical_-Supplementary Material/CDHRL/pretrained_models/HRL_minecraftpretrain6_level_1_target.pth
- 5444_causality_driven_hierarchical_-Supplementary Material/CDHRL/pretrained_models/HRL_minecraftpretrain6_level_2_eval.pth
- 5444_causality_driven_hierarchical_-Supplementary Material/CDHRL/pretrained_models/HRL_minecraftpretrain6_level_2_state.pth
- 5444_causality_driven_hierarchical_-Supplementary Material/CDHRL/pretrained_models/HRL_minecraftpretrain6_level_2_target.pth
- 5444_causality_driven_hierarchical_-Supplementary Material/CDHRL/pretrained_models/HRL_minecraftpretrain6_level_3_eval.pth
- 5444_causality_driven_hierarchical_-Supplementary Material/CDHRL/pretrained_models/HRL_minecraftpretrain6_level_3_state.pth
- 5444_causality_driven_hierarchical_-Supplementary Material/CDHRL/pretrained_models/HRL_minecraftpretrain6_level_3_target.pth
- 5444_causality_driven_hierarchical_-Supplementary Material/CDHRL/pretrained_models/HRL_minecraftpretrain6_level_4_eval.pth
- 5444_causality_driven_hierarchical_-Supplementary Material/CDHRL/pretrained_models/HRL_minecraftpretrain6_level_4_state.pth
- 5444_causality_driven_hierarchical_-Supplementary Material/CDHRL/pretrained_models/HRL_minecraftpretrain6_level_4_target.pth
- 5444_causality_driven_hierarchical_-Supplementary Material/CDHRL/pretrained_models/HRL_minecraftpretrain6_level_5_eval.pth
- 5444_causality_driven_hierarchical_-Supplementary Material/CDHRL/pretrained_models/HRL_minecraftpretrain6_level_5_state.pth
- 5444_causality_driven_hierarchical_-Supplementary Material/CDHRL/pretrained_models/HRL_minecraftpretrain6_level_5_target.pth
- 5444_causality_driven_hierarchical_-Supplementary Material/CDHRL/readme.txt
- 5444_causality_driven_hierarchical_-Supplementary Material/CDHRL/SCM.py
- 5444_causality_driven_hierarchical_-Supplementary Material/CDHRL/utils.py
- 5444_causality_driven_hierarchical_-Supplementary Material/cdhrl_nips2022_appendix.pdf
