# Supplementary material
Source: ML conference proceedings conference paper supplement (https://proceedings.neurips.cc/paper_files/paper/2022/hash/7e9fbd01b3084956dd8a070c7bf30bad-Abstract.html)
Supplement: Supplementary file 1 [file 7e9fbd01b3084956dd8a070c7bf30bad-Supplemental-Conference.zip › 5444_causality_driven_hierarchical_-Supplementary Material/CDHRL/mc.py]

from minecraft.mazeenv import MazeEnv
import gym
from mpi4py import MPI
from mpi4py.MPI import COMM_WORLD as comm
class McEnv(gym.Env):
    def __init__(self, seed = 42):
        self.variable_names = [
                               'workspace',#0
                               'furnace',#1
                               'jewelershop',#2
                               'wood',#3
                               'stone',#4
                               'coal',#5
                               'ironore',#6
                               'silverore',#7
                               'goldore',#8
                               'diamond',#9
                               'stick',#10
                               'stonepickaxe',#11
                               'iron',#12
                               'silver',#13
                               'ironpickaxe',#14
                               'gold',#15
                               'earings',#16
                               'ring',#17
                               'goldware',#18
                               'bracelet',#19
                               'necklace',#20
                               'Action'#21
                               ]
        self.variable_ranges = [2 for i in range(len(self.variable_names))]   
        self.variable_ranges[-1] = 6
        self.variable_num = len(self.variable_ranges)
        self.variable_operators = [0]
        #self.aux_info_ranges = [11 for i in range(4)]
        #self.aux_info_num = len(self.aux_info_ranges)
        #self.aux_info_ranges = [11, 2, 2, 2, 2]
        #self.aux_info_num = 5
        self.aux_info_ranges = [11]
        self.aux_info_num = 1
        #self.aux_info_ranges = []
        #self.aux_info_num = 0

        #sub_task_id_list = [i for i in range(18)] 
        sub_task_id_list = [12] 
        #sub_task_id_list = [7] 
        self.env = MazeEnv(game_len=100, sub_task_id_list=sub_task_id_list)
        self.action_space = gym.spaces.Discrete(6)
        self.reset(seed = seed)
        self.observation_space = gym.spaces.Box(shape=self.state.shape, low=-10000, high=10000)
        obj_num = [0 for i in range(self.env.config.nb_map_obj_type)]
        for x in range(10):
            for y in range(10):
                if self.env.map.item_map[x, y] >= 3:
                    obj_idx = self.env.map.item_map[x, y] - 3 
                    obj_num[obj_idx] = obj_num[obj_idx]+1
        print('map items', [(self.variable_names[i], obj_num[i]) for i in range(self.env.config.nb_map_obj_type)])
         
    def reset(self, seed=None):
        self.state, self.variables, self.info = self.env.reset(seed)
        self.variables = self.variables[-self.variable_num:]
        return self.state, self.variables
    
    def step(self, action, print_en = False):
        self.state, self.variables, self.reward, done, self.info = self.env.step(action, print_en)
        self.variables = self.variables[-self.variable_num:]
        return self.state, self.variables, self.reward, done, self.info
