# Supplementary material
Source: ML conference proceedings conference paper supplement (https://proceedings.neurips.cc/paper_files/paper/2022/hash/7e9fbd01b3084956dd8a070c7bf30bad-Abstract.html)
Supplement: Supplementary file 1 [file 7e9fbd01b3084956dd8a070c7bf30bad-Supplemental-Conference.zip › 5444_causality_driven_hierarchical_-Supplementary Material/CDHRL/SCM.py]

import math
import numpy as np
import torch
import torch.nn as nn
import torch.nn.functional as F
import torch.optim as optim
from torch.distributions import Categorical, Bernoulli
from torch.utils.data.sampler import BatchSampler, SubsetRandomSampler, SequentialSampler
import pickle

def init(module, weight_init, bias_init, gain=1):
    weight_init(module.weight.data, gain=gain)
    bias_init(module.bias.data)
    return module

class StructureParams(nn.Module):
    def __init__(self, v_num):
        super(StructureParams, self).__init__()
        self.v_num = v_num
        edge_params = torch.nn.Parameter(torch.zeros((v_num,v_num)))
        self.register_parameter('edge_params', edge_params)
    def L1_regularization(self, update_gs_masks, partial_graph):
        masks = torch.logical_or((1-update_gs_masks).bool(), partial_graph)
        masked_edge_params = self.edge_params.masked_fill(partial_graph, 0)
        return torch.sum(torch.abs(masked_edge_params))
    def DAG_regularization(self):
        e = torch.eye(self.v_num, device = self.edge_params.device).bool()
        probs = torch.sigmoid(self.edge_params).view(self.v_num, self.v_num).masked_fill(e, 0)
        ldag = torch.sum(torch.cosh(probs*probs.transpose(0, 1)))
        return ldag

class FunctionalNet(nn.Module):
    def __init__(self, in_size_list, aux_size_list=[]):
        super(FunctionalNet, self).__init__()
        init_ = lambda m: init(m, nn.init.orthogonal_, lambda x: nn.init.
                               constant_(x, 0), np.sqrt(2))
        self.v_num = len(in_size_list)
        self.in_size_list = in_size_list
        self.a_num = len(aux_size_list)
        self.aux_size_list = aux_size_list
        self.fs = []
        for i in range(self.v_num):
            i_dim = int(np.array(in_size_list+aux_size_list).sum())
            h_dim = 4*i_dim
            o_dim = in_size_list[i]
            self.fs.append(nn.Sequential(
                init_(nn.Linear(i_dim, h_dim)),
                nn.LeakyReLU(negative_slope=0.1),
                init_(nn.Linear(h_dim, h_dim)),
                nn.LeakyReLU(negative_slope=0.1),
                init_(nn.Linear(h_dim, o_dim))))
        self.fs = nn.ModuleList(self.fs)
      
             
    def forward(self, inputs, masks, aux_inputs=None):
        N = inputs.shape[0]
        out_probs_logits = []
        expand_params = torch.tensor(self.in_size_list, device = inputs.device)
        for i in range(self.v_num):
            expand_masks = torch.repeat_interleave(masks[i], expand_params).bool()
            x = inputs.masked_fill(expand_masks.view(1, -1), 0).float()
            x = torch.cat([x, aux_inputs], dim=1).view(N, int(np.array(self.in_size_list+self.aux_size_list).sum())).float()
            y = self.fs[i](x.float())
            out_probs_logits.append(y)
        return out_probs_logits

class SCM:
    def __init__(self, variable_range_list, s_lr, f_lr, device, aux_range_list, variable_names):
        self.v_num = len(variable_range_list)
        self.variable_range_list = variable_range_list
        self.aux_range_list = aux_range_list
        self.s_params = StructureParams(self.v_num).to(device)
        self.f_nets = FunctionalNet(variable_range_list, aux_range_list).to(device)
        self.device = device

        self.s_optimizer = optim.Adam(self.s_params.parameters(), lr=s_lr) 
        self.f_optimizer = optim.Adam(self.f_nets.parameters(), lr=f_lr) 
        self.variable_names = variable_names

    def save(self, directory, name, dag):
        np_dag = dag.numpy()
        pickle.dump(dag, open('%s/s_dag_%s.pth' % (directory, name), 'wb'))
        torch.save(self.s_params.state_dict(), '%s/s_params_%s.pth' % (directory, name))
        torch.save(self.f_nets.state_dict(), '%s/f_nets_%s.pth' % (directory, name))
    def load(self, directory, name):
        dag = pickle.load(open('%s/s_dag_%s.pth' % (directory, name), 'rb'))
        self.s_params.load_state_dict(torch.load('%s/s_params_%s.pth' % (directory, name),map_location='cpu'))
        self.f_nets.load_state_dict(torch.load('%s/f_nets_%s.pth' % (directory, name),map_location='cpu'))
        #return torch.from_numpy(np_dag)
        return dag

    def sample_configuration(self):
        configuration = torch.bernoulli(torch.sigmoid(self.s_params.edge_params))
        e = torch.eye(configuration.shape[0], device = configuration.device).bool()
        configuration = configuration.masked_fill(e, 1)
        return configuration.to(self.device)

    def get_DAG(self, causal_threshold, do_variables, names, dag):
        for src_idx in range(self.v_num):
            for dst_idx in range(self.v_num):
                if src_idx not in do_variables or dst_idx not in do_variables:
                    dag[dst_idx, src_idx] = False
        dag_probs = torch.sigmoid(self.s_params.edge_params)
        for src_idx in do_variables:
            for dst_idx in range(self.v_num):
                if dst_idx in do_variables: continue
                if src_idx != dst_idx and dag_probs[dst_idx, src_idx] > causal_threshold:
                    dag[dst_idx, src_idx] = True
        dag[-1, :] = False
        print('DAG:')
        for src_idx in range(self.v_num):
            print(names[src_idx])
            for dst_idx in range(self.v_num):
                if dag[dst_idx, src_idx]:
                    print('------->', names[dst_idx])
        var_depth = 0
        visited_vars = []
        var_depths = torch.zeros(self.v_num).long()
        while(len(visited_vars) < self.v_num):
            for dst_idx in range(self.v_num):
                if dst_idx in visited_vars: continue
                var_depth = 0 
                for src_idx in range(self.v_num):
                    if not dag[dst_idx, src_idx]:
                        continue
                    if src_idx in visited_vars:
                        var_depth = max(var_depth, var_depths[src_idx]+1)
                    else:
                        var_depth = -1
                        break 
                if var_depth >= 0:
                    visited_vars.append(dst_idx)
                    var_depths[dst_idx] = var_depth
        return dag, var_depths

    def compute_logregrets(self, x, y, configuration, do_variable, z = None):
        B = x.shape[0]
        logregrets = []
        input_masks = (1 - configuration).bool()
        if self.f_nets.a_num > 0:
            out_prob_logits = self.f_nets(x.view(B, -1), input_masks, z.view(B, -1))
        else:
            out_prob_logits = self.f_nets(x.view(B, -1), input_masks)
        for i in range(self.v_num):
            v = out_prob_logits[i].view(B, self.variable_range_list[i]).log_softmax(dim=1)
            index = y[:, i].view(B, 1).long()
            v = v.gather(dim=1, index=index).view(B, 1)
            logregrets.append(v)
        logregrets = torch.cat(logregrets, dim=1).view(B, self.v_num) # M*1*B, l(i): L(Vi)
        vn = logregrets.mean(0).detach()
        vn[do_variable] = 0
        return vn 

    def train_f(self, datas, do_variables, args):
        # train function params
        B = args.B
        Fs = args.Fs
        Ns = args.Ns
         
        x = datas[0]
        y = datas[1]
        z = datas[2]
        N = x.shape[0]
        batch = x.shape[1]
        assert(B*Ns == batch)
                
        x = torch.cat([F.one_hot(x.view(N*batch, self.v_num)[:, i].long(), 
                                 num_classes = self.variable_range_list[i]).view(N*batch, self.variable_range_list[i]) for i in range(self.v_num)], dim = 1)
        x = x.view(N, batch, -1)
        z = torch.cat([F.one_hot(z.view(N*batch, self.f_nets.a_num)[:, i].long(), 
                                     num_classes = self.aux_range_list[i]).view(N*batch, self.aux_range_list[i]) for i in range(self.f_nets.a_num)], dim = 1)
        z = z.view(N, batch, -1)

            
        
        for f_idx in range(Fs):
            batch_index = list(SubsetRandomSampler(range(B*Ns)))
            configuration = self.sample_configuration().detach()
            #configuration[10, -1] = True
            #configuration[10, 0] = True
            data_x = x[:, batch_index, :].view(N*batch, -1)
            data_y = y[:, batch_index, :].view(N*batch, -1)
            input_masks = (1 - configuration).bool()
            self.f_optimizer.zero_grad()
            out_prob_logits = self.f_nets(data_x, input_masks, z[:, batch_index, :].view(N*batch, -1))
            loss = 0
            loss_vector = [[] for i in range(len(do_variables))]
            for i in range(self.v_num):
                v_loss = F.cross_entropy(out_prob_logits[i].view(N*batch, self.variable_range_list[i]),
                                         data_y[:, i].view(N*batch).long(), reduction='none').view(N*batch)
                loss += v_loss.mean()
            if (f_idx+1) % 100 == 0:
                print('F', f_idx, 'loss', round(loss.item(), 4))
                #print('wood->stick', configuration[10, 3], loss_vector[do_variables.index(3)][10])
                #print('stone->stonepickaxe', configuration[11, 4], loss_vector[do_variables.index(4)][11])
                #print('F', f_idx, 'loss', round(loss.item(), 4))
            loss.backward()
            self.f_optimizer.step() 
        #assert(0)

    def train_s(self, datas, do_variables, args):
        B = args.B
        Ns = args.Ns
        Cs = args.Cs
        Qs = args.Qs
         
        x = datas[0]
        y = datas[1]
        z = datas[2]
        N = x.shape[0]
        batch = x.shape[1]
        assert(B*Ns == batch)
                
        x = torch.cat([F.one_hot(x.view(N*batch, self.v_num)[:, i].long(), 
                                 num_classes = self.variable_range_list[i]).view(N*batch, self.variable_range_list[i]) for i in range(self.v_num)], dim = 1)
        x = x.view(N, batch, -1)
        z = torch.cat([F.one_hot(z.view(N*batch, self.f_nets.a_num)[:, i].long(), 
                                 num_classes = self.aux_range_list[i]).view(N*batch, self.aux_range_list[i]) for i in range(self.f_nets.a_num)], dim = 1)
        z = z.view(N, batch, -1)
        # train structure params
        for q_idx in range(Qs):
            gammagrads = [[] for i in range(len(do_variables))]
            logregrets = [[] for i in range(len(do_variables))]
            batch_indexs = list(SubsetRandomSampler(range(B*Ns)))
            for n_idx in range(Ns):
                gammagrad = [0 for i in range(len(do_variables))]
                logregret = [0 for i in range(len(do_variables))]
                for c_idx in range(Cs):
                    for do_idx in range(len(do_variables)):
                        configuration = self.sample_configuration().detach()
                        batch_index = batch_indexs[B*n_idx:B*n_idx+B]
                        data_x = x[do_idx, batch_index, :].view(B, -1)
                        data_y = y[do_idx, batch_index, :].view(B, self.v_num)
                        logpn = self.compute_logregrets(data_x, data_y,
                                                        configuration, do_variables[do_idx],
                                                        z = z[do_idx, batch_index, :].view(B, -1))
                        with torch.no_grad():
                            logregret[do_idx] += logpn
                            gammagrad[do_idx] += (torch.sigmoid(self.s_params.edge_params) - configuration).view(self.v_num, self.v_num)
                         
                        if c_idx == Cs-1:
                            gammagrads[do_idx].append(gammagrad[do_idx])
                            logregrets[do_idx].append(logregret[do_idx])
            gammagrads = [torch.stack(gammagrads[do_idx]) for do_idx in range(len(do_variables))]
            normregret = [torch.stack(logregrets[do_idx]).softmax(0) for do_idx in range(len(do_variables))]
            dRdgamma   = [torch.einsum("kij,ki->ij", gammagrads[do_idx], normregret[do_idx]) for do_idx in range(len(do_variables))]

            siggamma = self.s_params.edge_params.sigmoid()
            Lmaxent  = ((siggamma)*(1-siggamma)).sum().mul(-args.lmax_coef)
            Lsparse  = siggamma.sum().mul(args.l1_coef)

            dRdgamma = torch.stack(dRdgamma).view(len(do_variables), self.v_num, self.v_num).sum(0)
            self.s_params.edge_params.grad = torch.zeros_like(self.s_params.edge_params)
            self.s_params.edge_params.grad.copy_(dRdgamma)
            (Lmaxent + Lsparse).backward()
            self.s_optimizer.step()

            print('Q', q_idx, 'complete')
            probs = torch.sigmoid(self.s_params.edge_params)
            print('stone->stonepickaxe probs', self.s_params.edge_params[11, 4], probs[11, 4])
            print('stone->goldore probs', self.s_params.edge_params[8, 4], probs[8, 4])
            print('A->Wood probs', self.s_params.edge_params[3, -1], probs[3, -1])
            print('A->Stone probs', self.s_params.edge_params[4, -1], probs[4, -1])
            print('A->coal probs', self.s_params.edge_params[5, -1], probs[5, -1])
            print('A->ironore probs', self.s_params.edge_params[6, -1], probs[6, -1])
            print('A->diamond probs', self.s_params.edge_params[9, -1], probs[9, -1])
            print('A->stick probs', self.s_params.edge_params[10, -1], probs[10, -1])
            print('A->stonepickaxe probs', self.s_params.edge_params[11, -1], probs[11, -1])
            print('A->iron probs', self.s_params.edge_params[12, -1], probs[12, -1])
            print('A->ironpickaxe probs', self.s_params.edge_params[14, -1], probs[14, -1])
            
            print('stonepickaxe->coal', self.s_params.edge_params[5, 11], probs[5, 11])
            print('stonepickaxe->ironore', self.s_params.edge_params[6, 11], probs[6, 11])
            print('ironpickaxe->diamond', self.s_params.edge_params[9, 14], probs[9, 14])
            
            print('stick->stonepickaxe probs', self.s_params.edge_params[11, 10], probs[11, 10])
            print('stick->ironpickaxe probs', self.s_params.edge_params[14, 10], probs[14, 10])
            print('iron->ironpickaxe probs', self.s_params.edge_params[14, 12], probs[14, 12])
            print('coal->iron probs', self.s_params.edge_params[12, 5], probs[12, 5])
            print('ironore->iron probs', self.s_params.edge_params[12, 6], probs[12, 6])
            
            print('wood->Stick probs', self.s_params.edge_params[10, 3], probs[10, 3])
