# Supplementary material
Source: ML conference proceedings conference paper supplement (https://proceedings.neurips.cc/paper_files/paper/2022/hash/7e9fbd01b3084956dd8a070c7bf30bad-Abstract.html)
Supplement: Supplementary file 1 [file 7e9fbd01b3084956dd8a070c7bf30bad-Supplemental-Conference.zip › 5444_causality_driven_hierarchical_-Supplementary Material/CDHRL/utils.py]

import argparse
import numpy as np
import copy

class ReplayBuffer:
    def __init__(self, max_size=1e6):
        self.buffer = []
        self.max_size = int(max_size)
        self.size = 0
    
    def add(self, transition):
        assert len(transition) == 7, "transition must have length = 7"
        
        # transiton is tuple of (state, action, reward, next_state, goal, gamma, done)
        self.buffer.append(copy.deepcopy(transition))
        self.size +=1
    
    def sample(self, batch_size):
        # delete 1/5th of the buffer when full
        if self.size > self.max_size:
            del self.buffer[0:int(self.size/5)]
            self.size = len(self.buffer)
        
        indexes = np.random.randint(0, len(self.buffer), size=batch_size)
        states, actions, rewards, next_states, goals, gamma, dones = [], [], [], [], [], [], []
        
        for i in indexes:
            states.append(np.array(self.buffer[i][0], copy=False))
            actions.append(np.array(self.buffer[i][1], copy=False))
            rewards.append(np.array(self.buffer[i][2], copy=False))
            next_states.append(np.array(self.buffer[i][3], copy=False))
            goals.append(np.array(self.buffer[i][4], copy=False))
            gamma.append(np.array(self.buffer[i][5], copy=False))
            dones.append(np.array(self.buffer[i][6], copy=False))
        
        return np.array(states), np.array(actions), np.array(rewards), np.array(next_states), np.array(goals),  np.array(gamma), np.array(dones)
    


def str2bool(v):
    if v.lower() in ('yes', 'true', 't', 'y', '1'):
        return True
    elif v.lower() in ('no', 'false', 'f', 'n', '0'):
        return False
    else:
        raise argparse.ArgumentTypeError('Boolean value expected.')
